# Supplementary material for: Europium-doped layered double hydroxide with spectral conversion property for enhanced photosynthesis
Source: Royal Society of Chemistry journal article supplement (doi:10.1039/d3en00394a), 2023-12-20
Supplement: d3en00394a1.pdf [file d3en00394a1.pdf]

## Supporting Information for

### Europium doped Layered Double Hydroxide with Spectral Conversion Property toward Enhanced Photosynthesis

*Chong Wang<sup>1</sup>, Zixian Li<sup>2</sup>, Yufei Zhao<sup>2</sup>, Changjiao Sun<sup>1</sup>, Yue Shen<sup>1</sup>, Shenshan Zhan<sup>1</sup>,  
Xingye Li<sup>1</sup>, Qi Liu<sup>1</sup>, Weichang Gao<sup>3</sup>, Tao Li<sup>1</sup> and Yan Wang,<sup>1,\*</sup>*

*<sup>1</sup>Institute of Environment and Sustainable Development in Agriculture, Chinese Academy of Agricultural Sciences, Beijing, 100081, P. R. China.*

*<sup>2</sup>Beijing University of Chemical Technology, P. R. China.*

*<sup>3</sup>Guizhou Academy of Tobacco Science, Upland Flue-cured Tobacco Quality & Ecology Key Laboratory of CNTC, Guiyang, 550081, P. R. China.*

#### CORRESPONDING AUTHOR FOOTNOTE

\* Corresponding authors. Fax: +86-10-82105997;

E-mail:; E-mail: [wangyan03@caas.cn](mailto:wangyan03@caas.cn) (Yan Wang)

**Reagents and Materials.** Analytical grade  $\text{Mg}(\text{NO}_3)_2 \cdot 6\text{H}_2\text{O}$  (99.5%),  $\text{Al}(\text{NO}_3)_3 \cdot 9\text{H}_2\text{O}$  (99.5%),  $\text{Eu}(\text{NO}_3)_3 \cdot 6\text{H}_2\text{O}$  (99.5%) and NaOH (99%) were purchased from Beijing Chemical Co. Ltd. Hogland nutrient solution was purchased from Beijing Coolaber Co. Ltd. Deionized water was used throughout the experimental process.

**Calculation details.** The calculations in this work were performed using the CASTEP code in Materials Studio version 8.0 software package (Accelrys Software Inc., San Diego, CA)<sup>1</sup>. The spin-polarized DFT+U calculations were performed using a plane wave implementation<sup>2</sup> with the generalized gradient approximation (GGA) Perdew-Burke-Ernzerhof (PBE) as the exchange-correlation functional<sup>3</sup>. The ultrasoft pseudopotential<sup>4</sup> was applied to describe the ionic cores to improve transferability and reduce the number of plane waves required in the expansion of the Kohn-Sham orbitals referred to in previous work<sup>5-8</sup>. The DFT dispersion correction was dealt with the Tkatchenko-Scheffler method to describe the weak interaction like hydrogen bonding and van der Waals force<sup>9</sup>. The cutoff energy was set as 400 eV to balance the cost and effectiveness<sup>10</sup>. The geometry optimization was based on the following points: (1) an energy tolerance of  $1.0 \times 10^{-5}$  eV/atom, (2) a maximum displacement tolerance of  $1.0 \times 10^{-3}$  Å, and (3) a maximum force tolerance of 0.03 eV/Å. When calculating the density of states, the k-point meshes for the Brillouin zone integrations were  $5 \times 5 \times 1$  in the a-, b-, and c- directions.

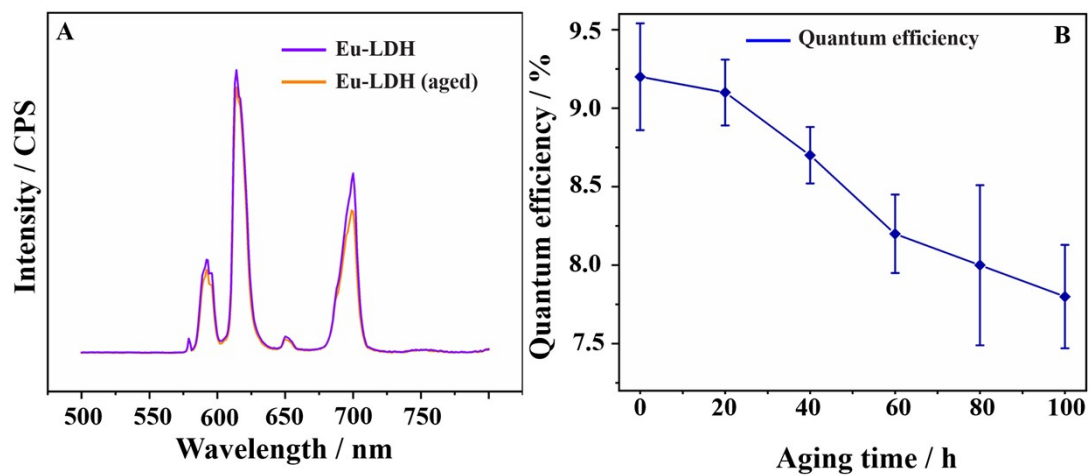

Figure. S1 (A) Photoluminescence spectra and (B) Quantum efficiency of Eu-LDH before and after aging for 100 h by ultraviolet accelerated weatherometer.

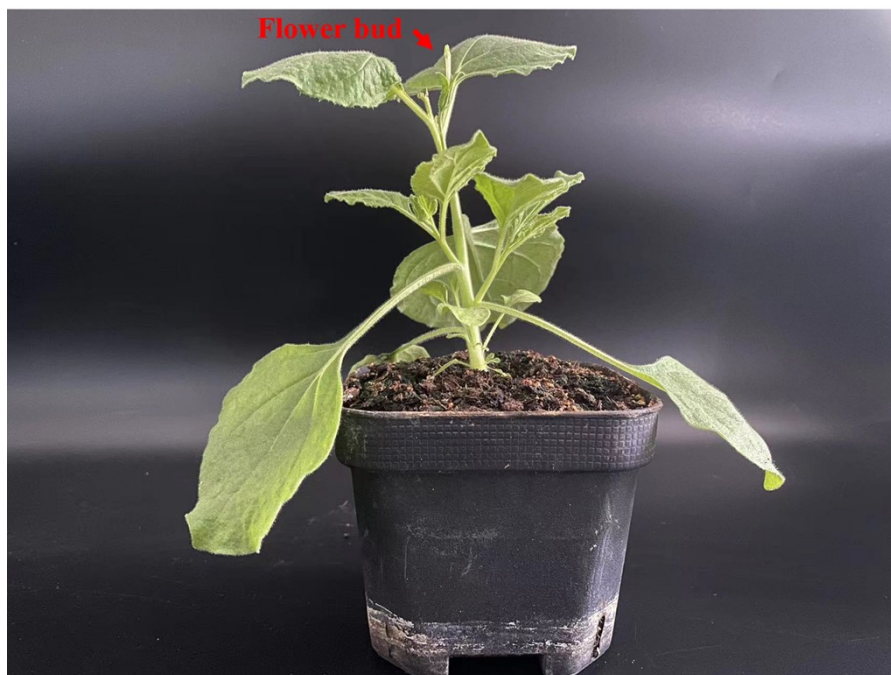

Figure. S2 Photograph of Eu-LDH treated seedling with the promoted flower bud formation growth state.

Table S1. The flower bud formation time information.

| Sample                | CK        | mixed<br>solution | LDH       | Eu-LDH     |
|-----------------------|-----------|-------------------|-----------|------------|
| <b>Time<br/>(day)</b> | 45.0±1.52 | 45.8±2.86         | 45.4±2.07 | 43.4±1.14* |

In table S1, time represents the day after the transplantation. The result was calculated in the way by mean ± SD. \* represents significant difference with CK by the Duncan test ( $p < 0.05$ ).

## References

1. M. D. Segall, J. D. L. Philip, M. J. Probert, C. J. Pickard, P. J. Hasnip, S. J. Clark and M. C. Payne, *J. Phys.: Condens. Matter*, **2002**, *14*, 2717.
2. M. C. Payne, M. P. Teter, D. C. Allan, T. A. Arias and J. D. Joannopoulos, *Rev. Mod. Phys.* **1992**, *64*, 1045-1097.
3. J. P. Perdew, K. Burke and M. Ernzerhof, *Phys. Rev. Lett.*, **1996**, *77*, 3865-3868.
4. M. Bajdich, M. García-Mota, A. Vojvodic, J. K. Nørskov and A. T. Bell, *J. Am. Chem. Soc.*, **2013**, *135*, 13521-13530.
5. Á. Valdés, Z. W. Qu, G. J. Kroes, J. Rossmeisl and J. K. Nørskov, *J. Phys. Chem. C* **2008**, *112*, 9872-9879.
6. I. C. Man, H.-Y. Su, F. Calle-Vallejo, H. A. Hansen, J. I. Martínez, N. G. Inoglu, J. Kitchin, T. F. Jaramillo, J. K. Nørskov and J. Rossmeisl, *ChemCatChem*, **2011**, *3*, 1159-1165.
7. D. Friebel, M. W. Louie, M. Bajdich, K. E. Sanwald, Y. Cai, A. M. Wise, M.-J. Cheng, D. Sokaras, T.-C. Weng, R. Alonso-Mori, R. C. Davis, J. R. Bargar, J. K. Nørskov, A. Nilsson and A. T. Bell, *J. Am. Chem. Soc.* **2015**, *137*, 1305-1313.
8. J. Resasco, L. D. Chen, E. Clark, C. Tsai, C. Hahn, T. F. Jaramillo, K. Chan and A. T. Bell, *J. Am. Chem. Soc.* **2017**, *139*, 11277-11287.
9. A. Tkatchenko and M. Scheffler, *Phys. Rev. Lett.* **2009**, *102*, 073005.
10. X. Li, L. Liang, Y. Sun, J. Xu, X. Jiao, X. Xu, H. Ju, Y. Pan, J. Zhu and Y. Xie, *J. Am. Chem. Soc.* **2019**, *141*, 423-430.
